# Supplementary material
Source: PubMed Central journal article supplement (PMC6677563)

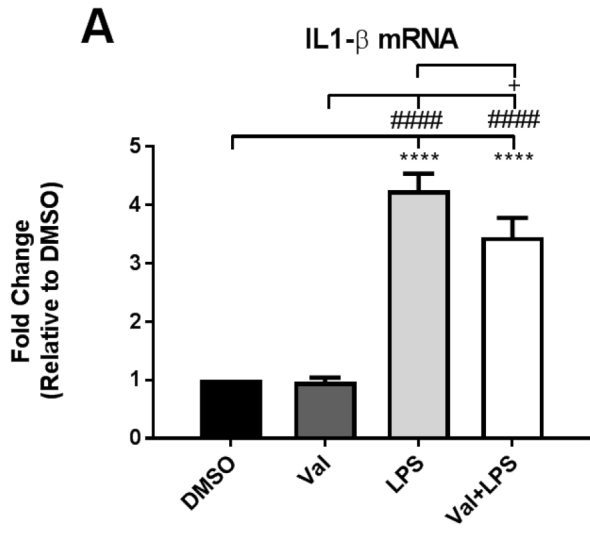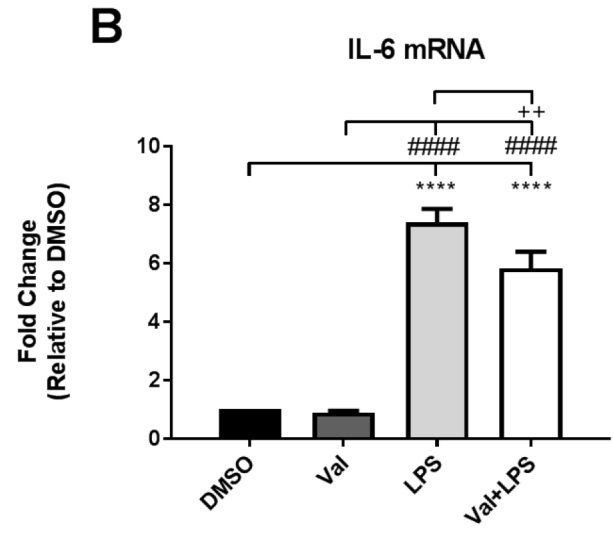

Supplement: NIHMS986593-supplement-12035_2018_1300_MOESM1_ESM.pdf [file NIHMS986593-supplement-12035_2018_1300_MOESM1_ESM.pdf]

**A****IL1- $\beta$  mRNA**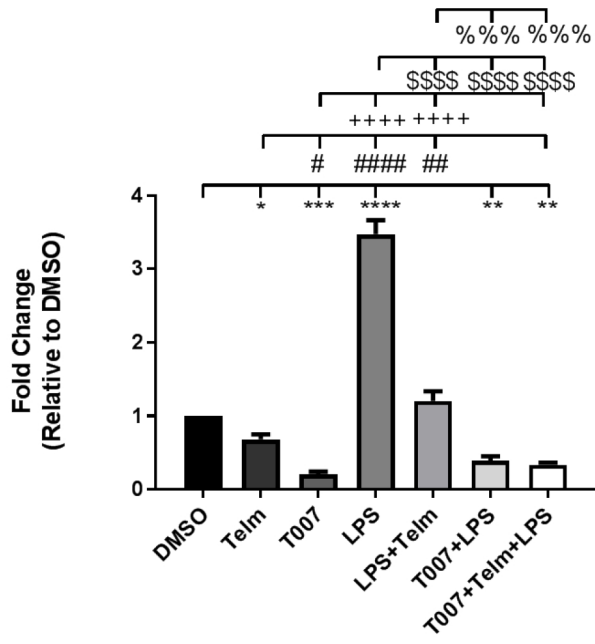**B****IL-6 mRNA**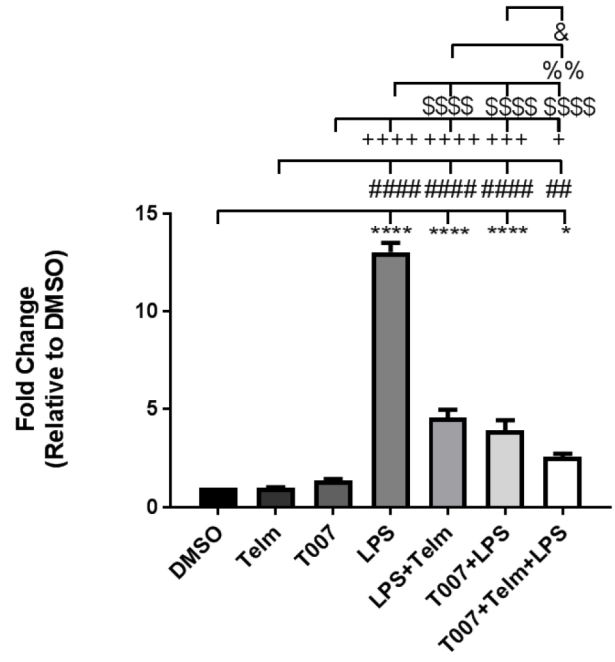

Supplement: NIHMS986593-supplement-12035_2018_1300_MOESM2_ESM.pdf [file NIHMS986593-supplement-12035_2018_1300_MOESM2_ESM.pdf]
